# Supplementary material
Source: PubMed Central journal article supplement (PMC9037717)
Supplement: NIHMS1796963-supplement-1.pdf [file NIHMS1796963-supplement-1.pdf]

# SUPPLEMENTAL FIGURE 1

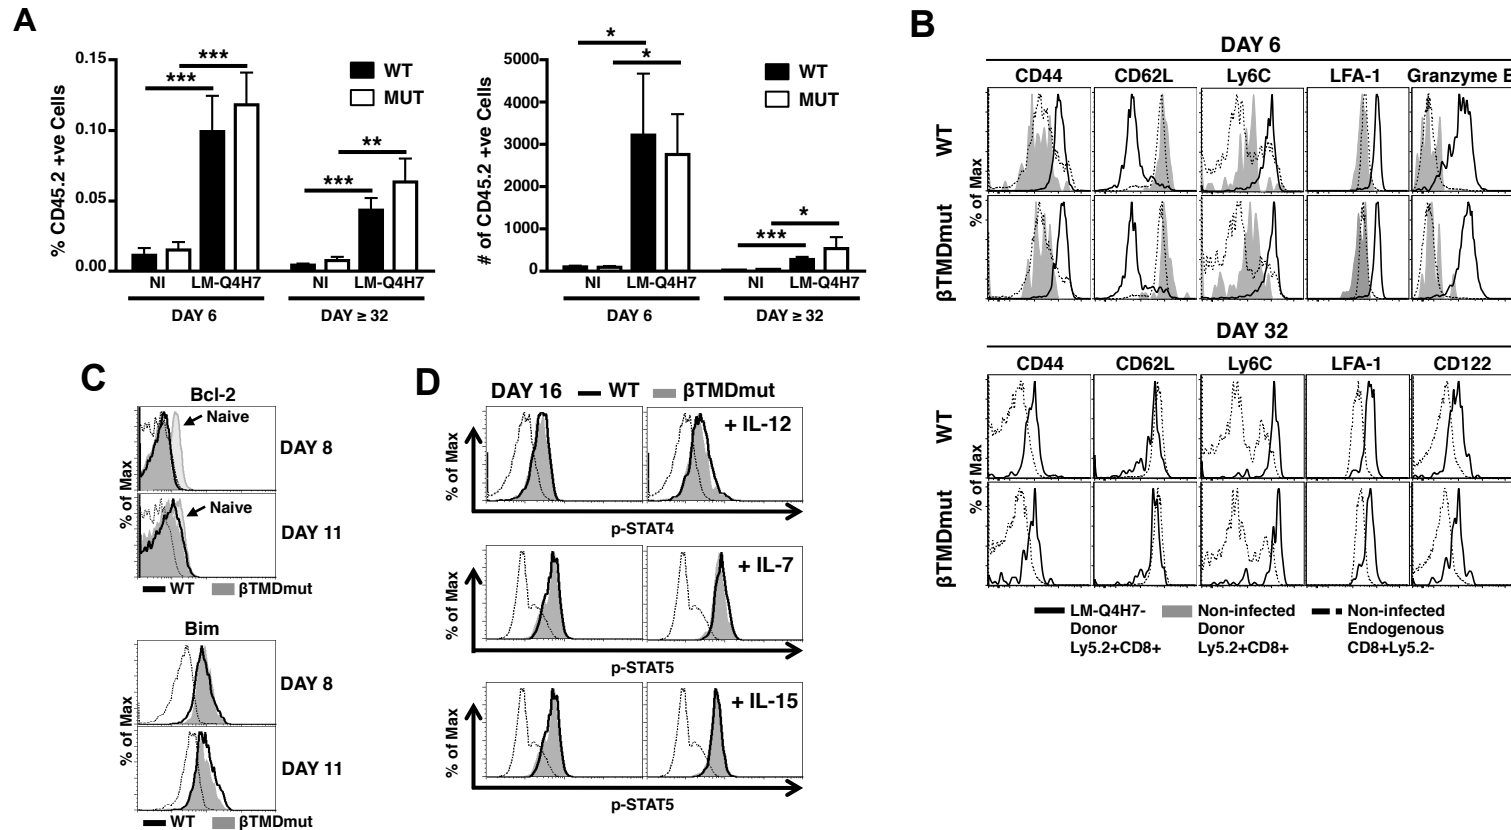

**A and B. WT and MUT cells become activated and generate memory T cells in response to LM-Q4H7.**  $10^3$  naïve WT or MUT donor CD45.2<sup>+</sup>CD8<sup>+</sup> T cells were adoptively transferred into CD45.1<sup>+</sup> hosts and challenged with  $10^3$  CFU LM-Q4H7 or PBS (noninfected-NI). At day 6 or day  $\geq 32$ , CD45.2<sup>+</sup> donor cells were subjected to magnetic bead enrichment (see Materials and Methods). CD45.2<sup>+</sup>CD8<sup>+</sup> donors frequency, numbers (A) and phenotype (B) from the bound fraction were determined by flow cytometry. Due to lack of detectable non-infected donor cells at memory, endogenous CD8<sup>+</sup> T cells from non-infected mice were used as controls at day  $\geq 32$ . Values in graphs in (A) are shown as mean  $\pm$  SEM (\*p<0.05, \*\*p<0.005, \*\*\*p<0.001). Graphs and histograms represent 3 independent experiments, n=3 mice each.

**C. WT and MUT cells exhibit similar expression of anti- and pro-apoptotic factors in the contraction phase of the LM-OVA immune response.** Mice were challenged as in Fig. 1. Bcl-2 and Bim expression of WT and MUT cells in the blood at day 8 and 11. Grey and dashed lines represent naïve and isotype control, respectively.

**D. MUT cells are not defective in IL-12R, IL-7R or IL-15R signaling.** Mice were challenged as in Fig. 1. Phosphorylation of STAT-4 and -5 determined by intracellular staining at day 16 of the LM-OVA response and upon stimulation with the cytokines are shown. Dashed line represents isotype control. Histograms representative of n  $\geq 3$  experiments, n = 3-5 mice each.

## SUPPLEMENTAL FIGURE 2 VERSION 2

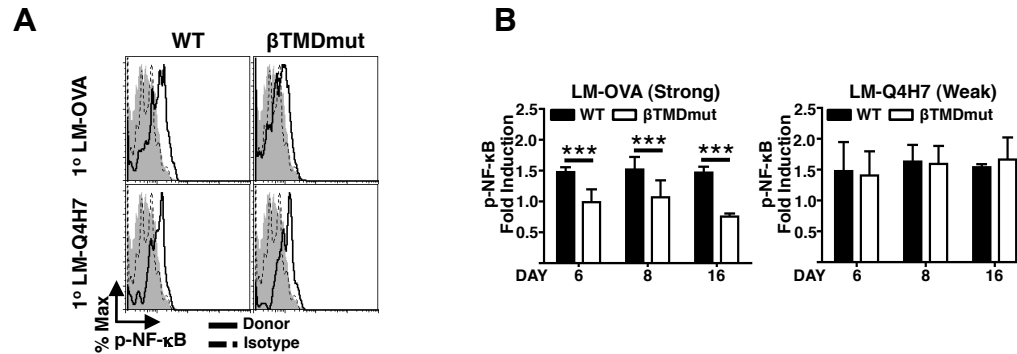

**MUT cells are defective in the induction of NF- $\kappa$ B signals in response to high affinity but not low affinity TCR ligands upon infection. A.** WT or  $\beta$ TMDmut donor CD8 T cells were adoptively transferred into congenic B6 hosts and challenged with  $1 \times 10^3$  CFU LM-OVA or LM-Q4H7. Histograms show phosphorylation of p65 NF- $\kappa$ B (Ser 536) in antigen-specific T cells at the peak of the responses by flow cytometry. Solid grey histogram represents the naïve control. Histograms shown are representative of  $n=4$  experiments,  $n=3-6$  mice each. **B.** Graphs show induction of p-NF- $\kappa$ B over naïve levels (mean  $\pm$  SD) at different days of the LM-OVA and LM-Q4H7 responses. Data is representative of  $n \geq 3$  independent experiments;  $n \geq 3$  mice per group. \* $p \leq 0.05$ , \*\* $p \leq 0.005$ , \*\*\* $p \leq 0.001$ .
